# Supplementary material
Source: PubMed Central journal article supplement (PMC5679212)
Supplement: NIHMS915072-supplement-supplement_1.pdf [file NIHMS915072-supplement-supplement_1.pdf]

## SUPPLEMENTARY ONLINE DATA

# A robust methodology to subclassify pseudokinases based on their nucleotide-binding properties

James M. MURPHY\*<sup>1,2</sup>, Qingwei ZHANG<sup>3</sup>, Samuel N. YOUNG\*, Michael L. REESE<sup>§3</sup>, Fiona P. BAILEY¶, Patrick A. EYERS¶, Daniela UNGUREANU<sup>¶</sup>, Henrik HAMMAREN<sup>¶</sup>, Olli SILVENNOINEN<sup>¶</sup>, Leila N. VARGHESE\*<sup>¶</sup>, Kelan CHEN\*<sup>¶</sup>, Anne TRIPAYDONIS\*, Natalia JURA\*\*<sup>¶</sup>, Koichi FUKUDA<sup>¶</sup>, Jun QIN<sup>¶</sup>, Zachary NIMCHUK<sup>¶4</sup>, Mary Beth MUDGETT<sup>§§</sup>, Sabine ELOWE¶¶, Christine L. GEE<sup>¶</sup>, Ling LIU\*\*\*<sup>5</sup>, Roger J. DALY\*\*\*<sup>5</sup>, Gerard MANNING<sup>¶</sup>, Jeffrey J. BABON\*<sup>¶</sup> and Isabelle S. LUCET<sup>1,2</sup>

\*The Walter and Eliza Hall Institute of Medical Research, Parkville, Victoria 3052, Australia

Department of Medical Biology, University of Melbourne, Parkville, Victoria 3050, Australia

Department of Biochemistry and Molecular Biology, School of Biomedical Sciences, Monash University, Clayton, Victoria 3800, Australia

§Department of Microbiology and Immunology, Stanford University, Stanford, CA 24305-5124, U.S.A.

¶Department of Biochemistry, Institute of Integrative Biology, University of Liverpool, Liverpool L69 7ZB, U.K.

School of Medicine and Institute of Biomedical Technology, University of Tampere and Tampere University Hospital, Tampere 33014, Finland

\*\*Cardiovascular Research Institute and Department of Cellular and Molecular Pharmacology, University of California San Francisco, San Francisco, CA 94158-9001, U.S.A.

Department of Molecular Cardiology, Lerner Research Institute, NB20, Cleveland Clinic, 9500 Euclid Avenue, Cleveland, OH 44195, U.S.A.

Department of Biology, California Institute of Technology, Pasadena, CA 91125, U.S.A.

§§Department of Biology, Stanford University, Stanford, CA 24305-5020, U.S.A.

¶¶Centre de Recherche du Centre Hospitalier Universitaire de Quebec and Faculte de Medicine, Departement de Pediatrie, Universite Laval, Quebec G1V 4G2, Canada

Australian Synchrotron, Clayton, Victoria 3168, Australia

\*\*\*Cancer Research Program, The Kinghorn Cancer Centre, Garvan Institute of Medical Research, 370 Victoria Street, Darlinghurst, Sydney, NSW 2010, Australia

Genentech, 1 DNA Way, MS 93, South San Francisco, CA 94010, U.S.A.

Supplementary Figures S1–S3 and Supplementary Table S1 are on the following pages.

<sup>1</sup> These authors contributed equally to this work.

<sup>2</sup> Correspondence may be addressed to either of these authors (email jamesm@wehi.edu.au or isabelle.lucet@monash.edu).

<sup>3</sup> Present address: Department of Pharmacology, University of Texas, Southwestern Medical Center, 6001 Forest Park Road, Dallas, TX 75390-9041, U.S.A.

<sup>4</sup> Present address: Department of Biological Sciences, Virginia Tech, 220 Ag Quad Lane, Blacksburg, VA 24061, U.S.A.

<sup>5</sup> Present address: Department of Biochemistry and Molecular Biology, School of Biomedical Sciences, Monash University, Clayton, Victoria 3800, Australia.

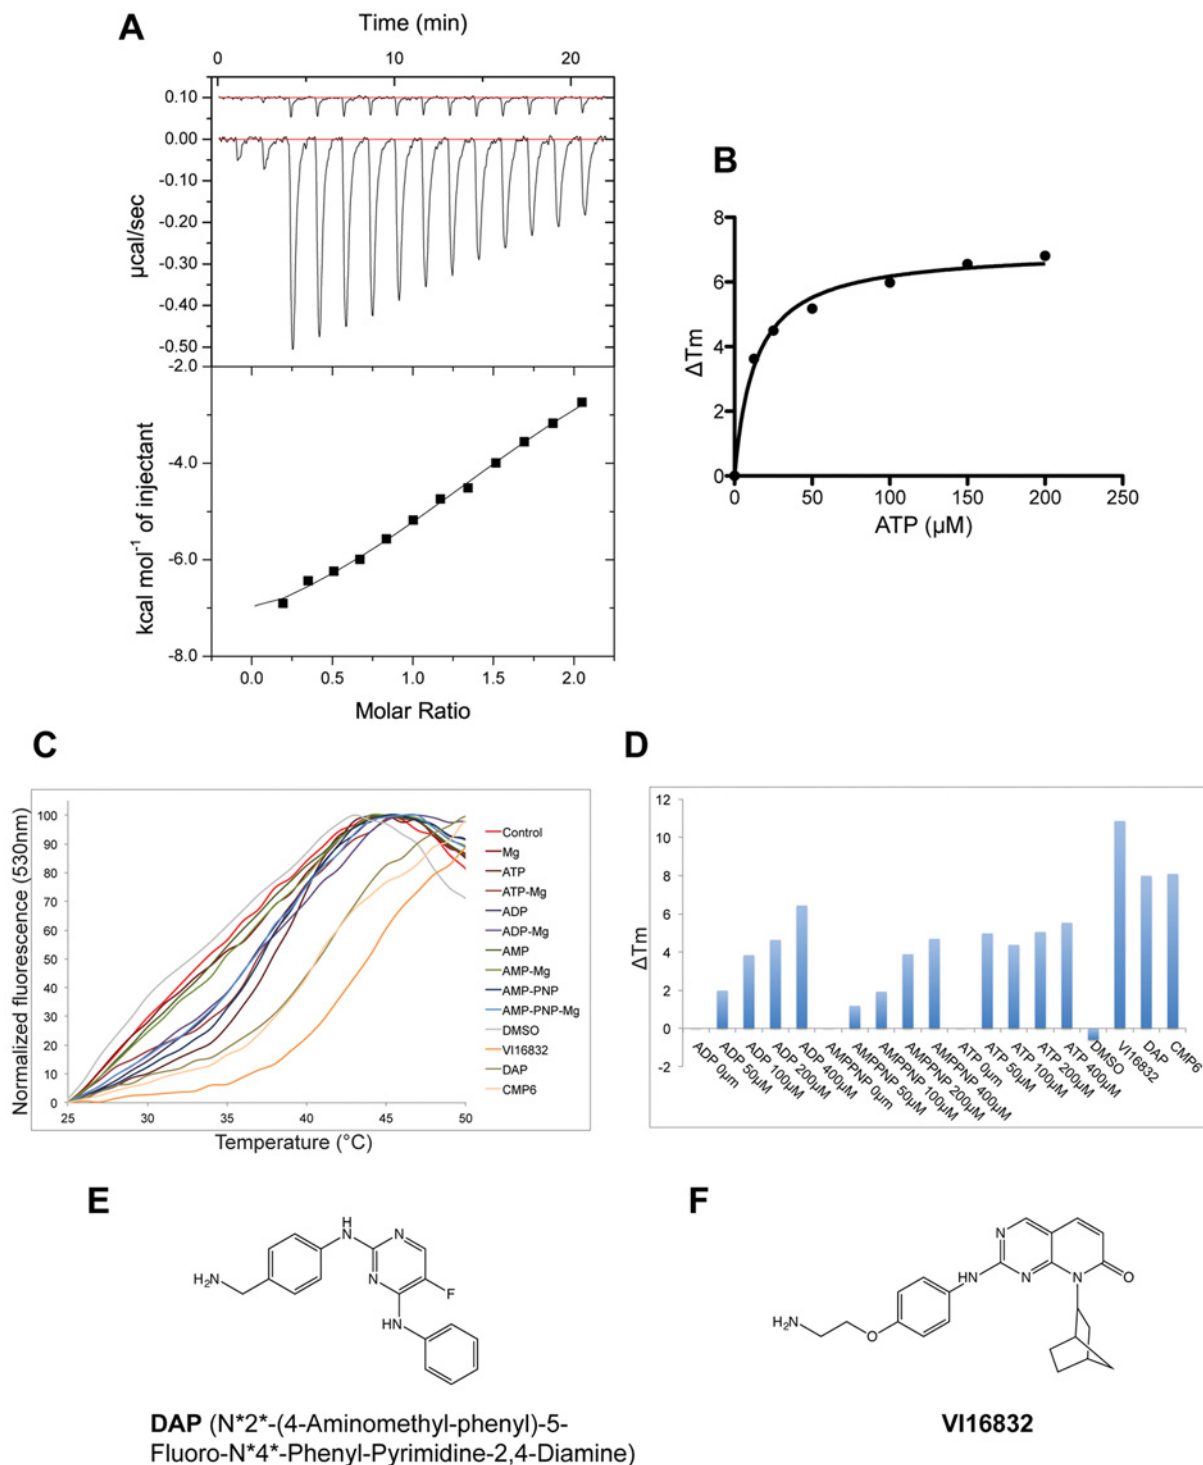

Figure S1 Validation of the thermal-shift assay for detecting ligand binding

(A) ITC data demonstrating ATP binding to MLKL. Upper panel: the upper isotherm represents a buffer control and the lower isotherm represents the injection and binding of ATP to 50  $\mu\text{M}$  MLKL. The  $K_d$  value for the experiment shown was calculated as 20  $\mu\text{M}$ . The  $K_d$  value calculated from a second experiment (results not shown) was 15  $\mu\text{M}$ . (B) Titration of MLKL with increasing concentrations of ATP in the thermal-shift assay. The data from two independent experiments yielded a  $K_d$  value (mean  $\pm$  S.E.M.) of  $13.6 \pm 1.9 \mu\text{M}$ . (C) Thermal denaturation curves for the tyrosine kinase (JH1) domain of JAK2 in the presence of 200  $\mu\text{M}$  nucleotide in the presence or absence of 1 mM  $\text{Mg}^{2+}$ . The inhibitors V116832 and DAP, as well as the JAK-specific inhibitor CMP6, all at concentrations of 40  $\mu\text{M}$ , were included as positive controls. (D)  $T_m$  analyses of JAK2(JH1) nucleotide-binding titrations (0–400  $\mu\text{M}$  nucleotide concentration) in the presence of 1 mM  $\text{Mg}^{2+}$ . At a 200  $\mu\text{M}$  nucleotide concentration (the concentration used elsewhere in the present study), we could detect ADP, ATP and AMP-PNP binding to JAK2(JH1), consistent with a limit of detection corresponding to  $K_d$  values in excess of 200  $\mu\text{M}$ . (E and F) Chemical structures of the promiscuous inhibitors DAP [5] (E) and V116832 [6,7] (F).

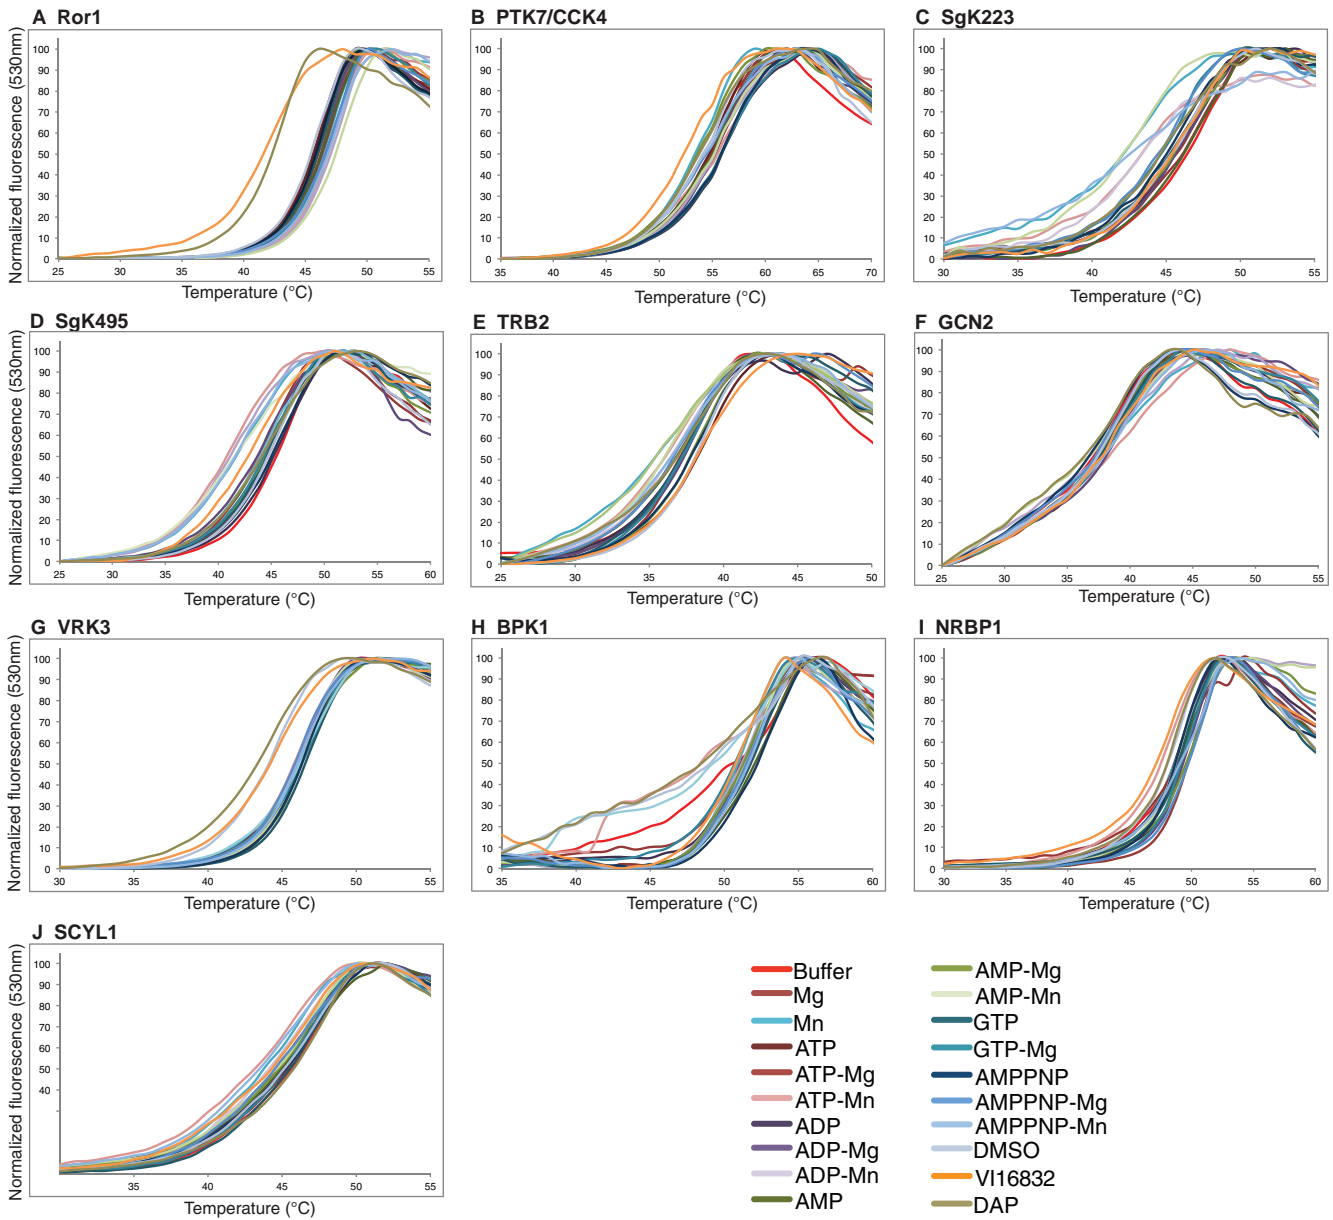

Figure S2 Thermal denaturation curves of Class 1 (no detectable nucleotide or cation binding) pseudokinases

Selected data from this pseudokinase subclass are presented in Figure 2 of the main text. Thermal denaturation curves for Ror1 (A), PTK7/CCK4 (B), SgK223 (C), SgK495 (D), TRB2 (E), GCN2 (F), VRK3 (G), BPK1 (H), NRBP1 (I) and SCYL1 [SCYL1-like 1 (*S. cerevisiae*)] (J) did not detectably shift in the presence of nucleotides with or without cations. A colour key for the curve labelling is underneath the curves. Control experiments establishing sensitivity of the assay for nucleotide binding are shown in Figure S1.

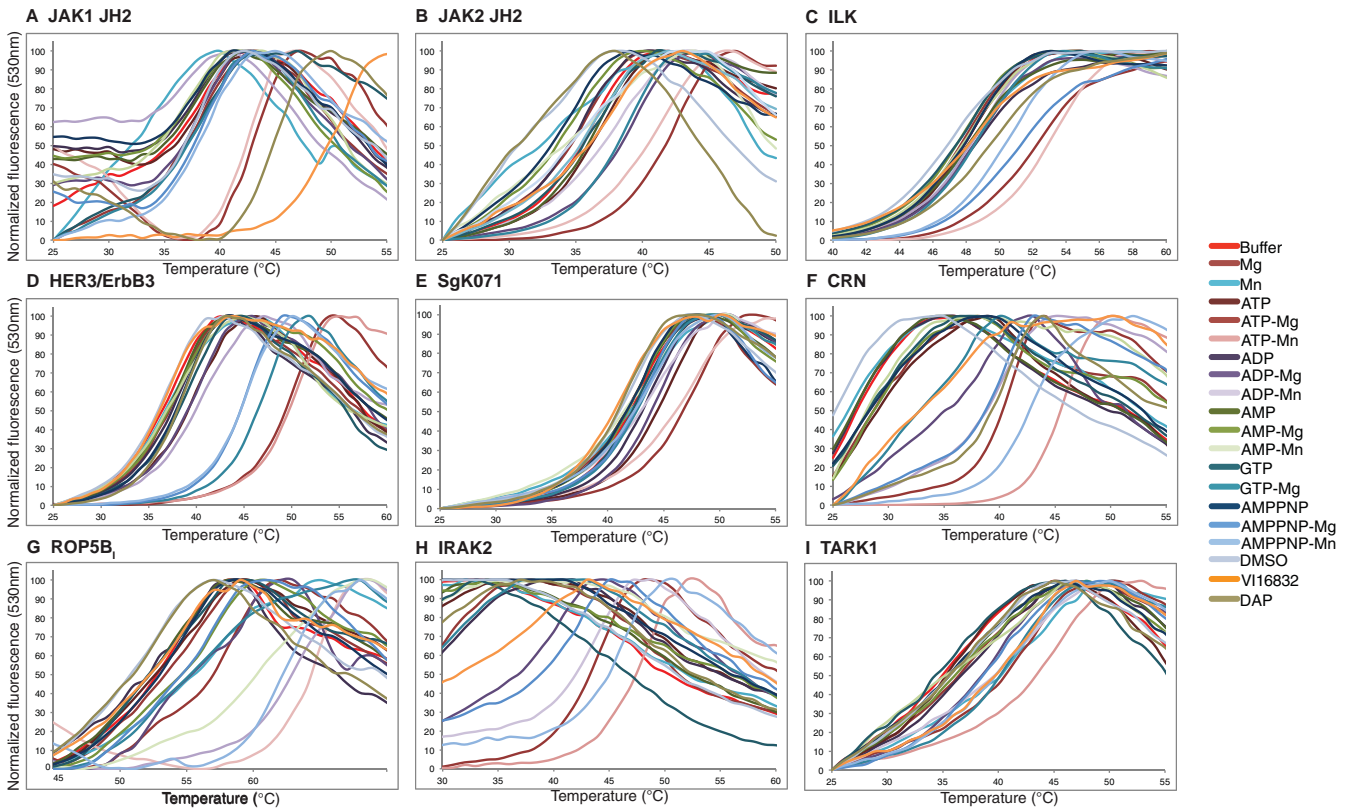

Figure S3 Thermal denaturation curves of Class 4 (nucleotide- and cation-binding) pseudokinases

The  $T_m$  values calculated from these curves are presented as histograms in Figure 4 of the main text.

Table S1 Sources of cDNA templates for previously undescribed expression constructs

| Gene           | GenBank® accession number | Template source                              | Reference |
|----------------|---------------------------|----------------------------------------------|-----------|
| PTK7/CCK4      | U40271                    | Professor S.-T. Lee                          | [1]       |
| Ror1           | NM_005012                 | Dr A. Gentile                                | [2]       |
| IRAK3          | NM_007199                 | Dr William Hahn* via Addgene (plasmid 23627) | [3]       |
| GCN2           | BC072637                  | IMAGE clone 30354433                         |           |
| ULK4           | NM_017886                 | Dr William Hahn* via Addgene (plasmid 23849) | [3]       |
| IRAK2          | NM_001570                 | Dr William Hahn* via Addgene (plasmid 23412) | [3]       |
| MLKL           | NM_152649                 | Synthetic; DNA2.0 (CA)                       |           |
| VRK3           | BC095449                  | IMAGE clone 30721912                         |           |
| TARK1          | FJ176293                  | M.B. Mudgett                                 | [4]       |
| EphB6          | NM_004445                 | Dr William Hahn* via Addgene (plasmid 23931) | [3]       |
| NRBP1          | NM_013392                 | Dr William Hahn* via Addgene (plasmid 23568) | [3]       |
| SCYL1          | BC069233                  | IMAGE clone 6581110                          |           |
| RYK            | BC032275                  | IMAGE clone 5370100                          |           |
| CASK           | NM_003688                 | IMAGE clone 40125862                         |           |
| Sgk495/STK40   | NM_032017                 | IMAGE clone 4109652                          |           |
| TRB2           | BC002637                  | IMAGE clone 3607549                          |           |
| Sgk071/C9orf96 | NM_153710                 | IMAGE clone 5265506                          |           |

\*Harvard Medical School, Boston, MA, U.S.A.

## REFERENCES

- 1 Park, S. K., Lee, H. S. and Lee, S. T. (1996) Characterization of the human full-length PTK7 cDNA encoding a receptor protein tyrosine kinase-like molecule closely related to chick KLG. *J. Biochem.* **119**, 235–239
- 2 Gentile, A., Lazzari, L., Benvenuti, S., Trusolino, L. and Comoglio, P. M. (2011) Ror1 is a pseudokinase that is crucial for Met-driven tumorigenesis. *Cancer Res.* **71**, 3132–3141
- 3 Johannessen, C. M., Boehm, J. S., Kim, S. Y., Thomas, S. R., Wardwell, L., Johnson, L. A., Emery, C. M., Stransky, N., Cogdill, A. P., Barretina, J. et al. (2010) COT drives resistance to RAF inhibition through MAP kinase pathway reactivation. *Nature* **468**, 968–972
- 4 Kim, J. G., Li, X., Roden, J. A., Taylor, K. W., Aakre, C. D., Su, B., Lalonde, S., Kirik, A., Chen, Y., Baranage, G. et al. (2009) *Xanthomonas* T3S effector XopN suppresses PAMP-triggered immunity and interacts with a tomato atypical receptor-like kinase and TFT1. *Plant Cell* **21**, 1305–1323
- 5 Bantscheff, M., Eberhard, D., Abraham, Y., Bastuck, S., Boesche, M., Hobson, S., Mathieson, T., Perrin, J., Rida, M., Rau, C. et al. (2007) Quantitative chemical proteomics reveals mechanisms of action of clinical ABL kinase inhibitors. *Nat. Biotechnol.* **25**, 1035–1044
- 6 Daub, H., Olsen, J. V., Bairlein, M., Gnad, F., Oppermann, F. S., Korner, R., Greff, Z., Keri, G., Stemmann, O. and Mann, M. (2008) Kinase-selective enrichment enables quantitative phosphoproteomics of the kinome across the cell cycle. *Mol. Cell* **31**, 438–448
- 7 Oppermann, F. S., Gnad, F., Olsen, J. V., Hornberger, R., Greff, Z., Keri, G., Mann, M. and Daub, H. (2009) Large-scale proteomics analysis of the human kinome. *Mol. Cell. Proteomics* **8**, 1751–1764

---

Received 30 August 2013/8 October 2013; accepted 10 October 2013

Published as BJ Immediate Publication 10 October 2013, doi:10.1042/BJ20131174
